# Supplementary material for: Inferring Epidemiological Dynamics with Bayesian Coalescent Inference: The Merits of Deterministic and Stochastic Models
Source: Oxford University Press journal article supplement (doi:10.1534/genetics.114.172791), 2014-12-19
Supplement: figures1.pdf [file figures1.pdf]

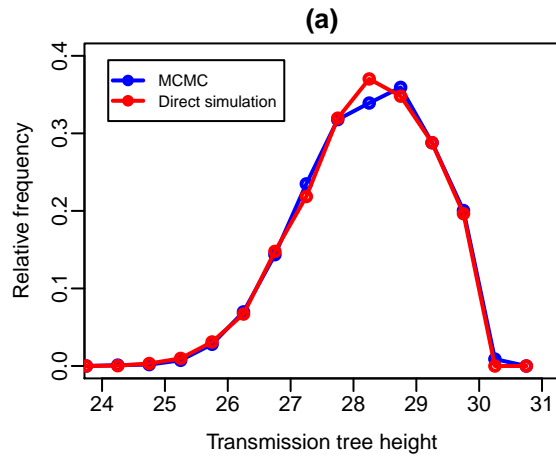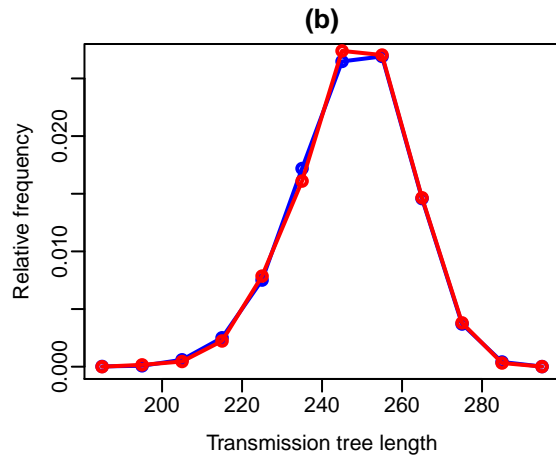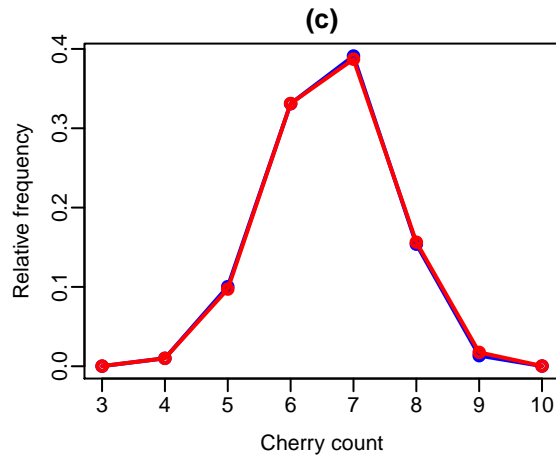

Figure S1: Comparison between distributions of summary statistics of trees sampled using MCMC employing our implementation of the *deterministic coalescent SIR model* likelihood and those calculated, and those of trees sampled using direct simulation. Summary statistics shown are (a) the age of the MRCA of the transmission tree, (b) the sum of all edge lengths in the tree, and (c) the total number of two-leaf clades in the tree.
