# Supplementary material for: Inferring Epidemiological Dynamics with Bayesian Coalescent Inference: The Merits of Deterministic and Stochastic Models
Source: Oxford University Press journal article supplement (doi:10.1534/genetics.114.172791), 2014-12-19
Supplement: figures3.pdf [file figures3.pdf]

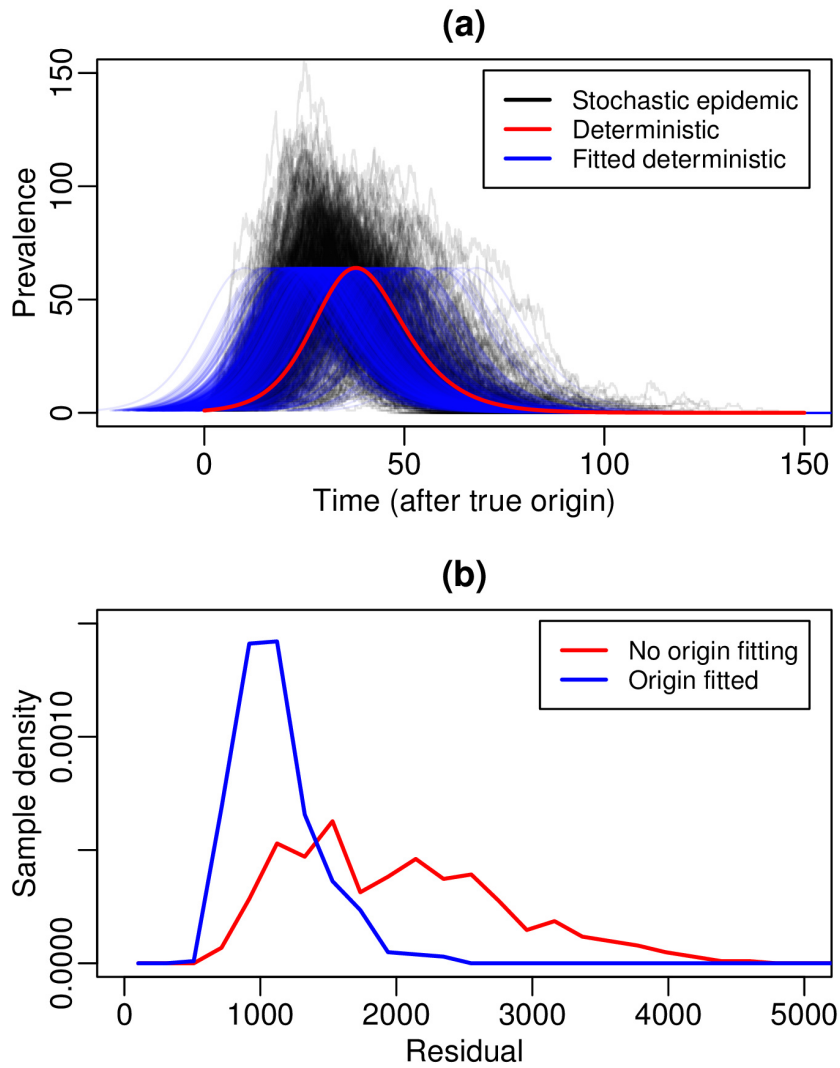

Figure S3: (a) True stochastic SIR trajectories simulated jointly alongside phylogenies, with the corresponding trajectories used by deterministic coalescent SIR. Adjusting deterministic coalescent SIR to fit the underlying stochastic trajectories causes major shifts to the origin  $z_0$ . (b) Deterministic residuals with  $z_0$  either fitted or not.
