# Supplementary material for: Inferring Epidemiological Dynamics with Bayesian Coalescent Inference: The Merits of Deterministic and Stochastic Models
Source: Oxford University Press journal article supplement (doi:10.1534/genetics.114.172791), 2014-12-19
Supplement: figures4.pdf [file figures4.pdf]

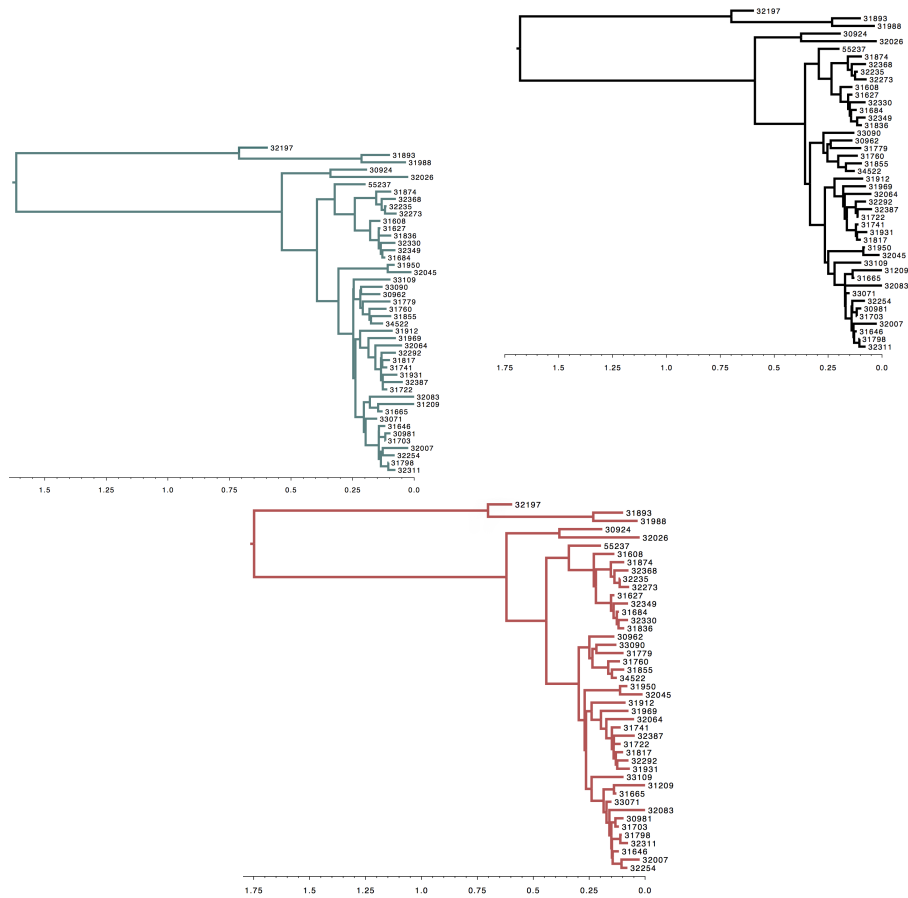

Figure S4: Representative influenza A (H1N1) posterior trees from inference using the stochastic coalescent SIR (left), deterministic coalescent SIR (right), BDSIR (bottom) models.
