# Supplementary material for: Inferring Epidemiological Dynamics with Bayesian Coalescent Inference: The Merits of Deterministic and Stochastic Models
Source: Oxford University Press journal article supplement (doi:10.1534/genetics.114.172791), 2014-12-19
Supplement: figures6.pdf [file figures6.pdf]

### HIV-1 subtype B: Estimates for Tree Height and the Origin of the Epidemic

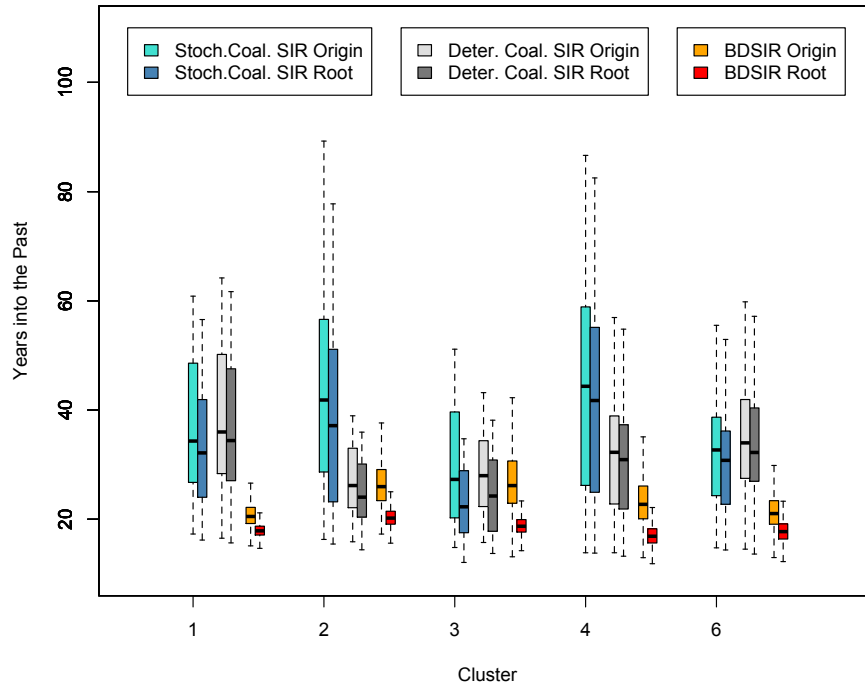

Figure S6: 95% HPD intervals for coalescent [VOLZ (2012)] and birth-death [KÜHNERT *et al.* (2014)] estimations of the time into the past at which the root of the HIV-1 tree and introduction of the first infection occurred.
