# Supplementary material for: Inferring Epidemiological Dynamics with Bayesian Coalescent Inference: The Merits of Deterministic and Stochastic Models
Source: Oxford University Press journal article supplement (doi:10.1534/genetics.114.172791), 2014-12-19
Supplement: figures7.pdf [file figures7.pdf]

### HIV-1 subtype B: Estimates of Gamma

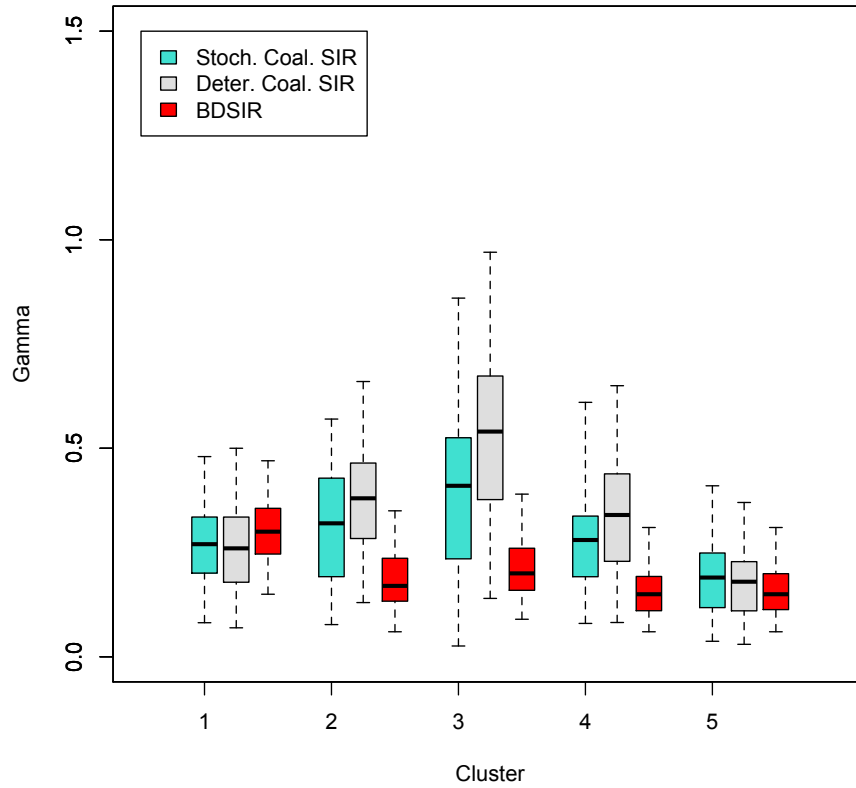

Figure S7: 95% HPD intervals of  $\gamma$  for the HIV-1 subtype B UK cluster analyses using coalescent and birth-death methods.
