# Supplementary material for: Inferring Epidemiological Dynamics with Bayesian Coalescent Inference: The Merits of Deterministic and Stochastic Models
Source: Oxford University Press journal article supplement (doi:10.1534/genetics.114.172791), 2014-12-19
Supplement: tables1.pdf [file tables1.pdf]

Table S1: Simulation Study Results for Stochastic Coalescent Trees

| $\eta$          | Inference      | Truth    | Mean  | Median | Error | Bias  | Relative HPD width | 95% HPD accuracy |
|-----------------|----------------|----------|-------|--------|-------|-------|--------------------|------------------|
| $\mathcal{R}_0$ | Stoch.Coal.SIR | 2.50     | 2.81  | 2.64   | 0.11  | 0.08  | 0.95               | 100.00%          |
|                 | Deter.Coal.SIR | 2.50     | 2.73  | 2.65   | 0.14  | 0.06  | 0.85               | 96.00%           |
| $\gamma$        | Stoch.Coal.SIR | 0.30     | 0.28  | 0.26   | 0.16  | -0.11 | 1.17               | 99.00%           |
|                 | Deter.Coal.SIR | 0.30     | 0.30  | 0.28   | 0.18  | -0.03 | 1.20               | 99.00%           |
| $S_{(0)}$       | Stoch.Coal.SIR | 999      | 1456  | 986    | 0.21  | 0.02  | 3.93               | 100.00%          |
|                 | Deter.Coal.SIR | 999      | 1720  | 1057   | 0.48  | 0.24  | 4.28               | 99.00%           |
| $z_{(0)}$       | Stoch.Coal.SIR | (varies) | 42.36 | 40.43  | 0.03  | 0.02  | 0.20               | 98.00%           |
|                 | Deter.Coal.SIR | (varies) | 41.25 | 39.77  | 0.03  | 0.01  | 0.07               | 64.00%           |
