# Supplementary material for: Inferring Epidemiological Dynamics with Bayesian Coalescent Inference: The Merits of Deterministic and Stochastic Models
Source: Oxford University Press journal article supplement (doi:10.1534/genetics.114.172791), 2014-12-19
Supplement: tables2.pdf [file tables2.pdf]

Table S2: Simulation Study Results for Deterministic Coalescent Trees

| $\eta$            | Inference      | Truth | Mean  | Median | Error | Bias    | Relative HPD width | 95% HPD accuracy |
|-------------------|----------------|-------|-------|--------|-------|---------|--------------------|------------------|
| $\mathcal{R}_0$   | Stoch.Coal.SIR | 2.50  | 2.44  | 2.37   | 0.06  | -0.05   | 0.67               | 100.00%          |
|                   | Deter.Coal.SIR | 2.50  | 2.51  | 2.46   | 0.08  | -0.01   | 0.59               | 99.00%           |
| $\gamma$          | Stoch.Coal.SIR | 0.30  | 0.33  | 0.31   | 0.07  | 0.05    | 1.00               | 100.00%          |
|                   | Deter.Coal.SIR | 0.30  | 0.32  | 0.30   | 0.10  | 0.02    | 0.79               | 100.00%          |
| $\tilde{S}_{(0)}$ | Stoch.Coal.SIR | 999   | 1586  | 1142   | 0.26  | 0.20    | 3.83               | 100.00%          |
|                   | Deter.Coal.SIR | 999   | 1426  | 1030   | 0.36  | 0.13    | 3.03               | 100.00%          |
| $z_{(0)}$         | Stoch.Coal.SIR | 44.12 | 45.52 | 44.74  | 0.02  | 0.01    | 0.19               | 93.00%           |
|                   | Deter.Coal.SIR | 44.12 | 44.34 | 44.11  | 0.02  | 1.93E-3 | 0.08               | 92.00%           |
