# Supplementary material for: Inferring Epidemiological Dynamics with Bayesian Coalescent Inference: The Merits of Deterministic and Stochastic Models
Source: Oxford University Press journal article supplement (doi:10.1534/genetics.114.172791), 2014-12-19
Supplement: tables3.pdf [file tables3.pdf]

Table S3: Results for Homochronous Sampling

| $\eta$          | Inference      | Truth | Mean  | Median | Error | Bias  | Relative HPD width | 95% HPD accuracy |
|-----------------|----------------|-------|-------|--------|-------|-------|--------------------|------------------|
| $\mathcal{R}_0$ | Stoch.Coal.SIR | 2.50  | 3.04  | 2.74   | 0.13  | 0.11  | 1.32               | 100.00%          |
|                 | Deter.Coal.SIR | 2.50  | 4.05  | 3.29   | 0.34  | 0.32  | 2.38               | 100.00%          |
|                 | BDSIR          | 2.50  | 2.84  | 2.49   | 0.16  | 0.03  | 1.45               | 97.00%           |
| $\gamma$        | Stoch.Coal.SIR | 0.30  | 0.26  | 0.23   | 0.25  | -0.21 | 1.43               | 100.00%          |
|                 | Deter.Coal.SIR | 0.30  | 0.26  | 0.19   | 0.36  | -0.31 | 2.03               | 100.00%          |
|                 | BDSIR          | 0.30  | 0.23  | 0.17   | 0.42  | -0.42 | 2.04               | 100.00%          |
| $S_{(0)}$       | Stoch.Coal.SIR | 999   | 1660  | 1065   | 0.18  | 0.09  | 4.75               | 100.00%          |
|                 | Deter.Coal.SIR | 999   | 4127  | 679    | 0.78  | 0.09  | 10.24              | 100.00%          |
|                 | BDSIR          | 999   | 1907  | 1320   | 0.41  | 0.41  | 4.86               | 100.00%          |
| $z_{(0)}$       | Stoch.Coal.SIR | 20.0  | 20.17 | 19.82  | 0.09  | -0.03 | 0.43               | 95.00%           |
|                 | Deter.Coal.SIR | 20.0  | 19.09 | 19.21  | 0.09  | -0.05 | 0.19               | 73.00%           |
|                 | BDSIR          | 20.0  | 36.56 | 29.38  | 0.55  | 0.54  | 4.24               | 100.00%          |
