# Supplementary material for: Inferring Epidemiological Dynamics with Bayesian Coalescent Inference: The Merits of Deterministic and Stochastic Models
Source: Oxford University Press journal article supplement (doi:10.1534/genetics.114.172791), 2014-12-19
Supplement: tables4.pdf [file tables4.pdf]

Table S4: Simulation Study Results: The Effect of Broader Priors on Deterministic Coalescent SIR

| $\eta$          | St. Dev. | Truth    | Mean   | Median | Error | Bias     | Relative HPD width | 95% HPD accuracy |
|-----------------|----------|----------|--------|--------|-------|----------|--------------------|------------------|
| $\mathcal{R}_0$ | 2        | 1.50     | 2.06   | 1.75   | 0.40  | 0.35     | 0.86               | 79.00%           |
| $\mathcal{R}_0$ | 1        | 1.50     | 1.80   | 1.49   | 0.24  | 0.15     | 0.52               | 85.00%           |
| $\mathcal{R}_0$ | 2        | 2.50     | 3.31   | 2.85   | 0.34  | 0.24     | 1.43               | 95.00%           |
| $\mathcal{R}_0$ | 1        | 2.50     | 2.68   | 2.49   | 0.13  | 0.04     | 0.80               | 99.00%           |
| $\gamma$        | 2        | 0.30     | 0.31   | 0.23   | 0.37  | -0.12    | 1.59               | 96.00%           |
| $\gamma$        | 1        | 0.30     | 0.26   | 0.23   | 0.27  | -0.22    | 1.15               | 89.00%           |
| $\gamma$        | 2        | 0.30     | 0.31   | 0.25   | 0.33  | -0.09    | 1.59               | 95.00%           |
| $\gamma$        | 1        | 0.30     | 0.32   | 0.29   | 0.16  | 3.14E-3  | 1.27               | 99.00%           |
| $S_{(0)}$       | 2        | 499      | 2041   | 249    | 1.40  | 0.49     | 7.75               | 85.00%           |
| $S_{(0)}$       | 1        | 499      | 562    | 361    | 0.44  | -0.26    | 3.36               | 91.00%           |
| $S_{(0)}$       | 2        | 999      | 3028   | 717    | 1.05  | 0.33     | 6.60               | 94.00%           |
| $S_{(0)}$       | 1        | 499      | 553.38 | 337    | 0.42  | -0.26    | 3.08               | 92.00%           |
| $z_{(0)}$       | 2        | (varies) | 65.10  | 62.01  | 0.04  | 0.03     | 0.25               | 86.00%           |
| $z_{(0)}$       | 1        | (varies) | 91.03  | 72.51  | 0.39  | 0.38     | 0.42               | 88.00%           |
| $z_{(0)}$       | 2        | (varies) | 40.97  | 39.85  | 0.03  | -6.78E-4 | 0.08               | 81.00%           |
| $z_{(0)}$       | 1        | (varies) | 112.79 | 90.37  | 0.26  | 0.26     | 0.94               | 85.00%           |
