# Supplementary material for: Inferring Epidemiological Dynamics with Bayesian Coalescent Inference: The Merits of Deterministic and Stochastic Models
Source: Oxford University Press journal article supplement (doi:10.1534/genetics.114.172791), 2014-12-19
Supplement: tables5.pdf [file tables5.pdf]

Table S5: Comparison of Computation Times for Bayesian Inference of Epidemic Parameters from Genetic Sequence Data using SIR Models

| Data Type                         | Inference Model | Mean time per million samples (MCMC) |
|-----------------------------------|-----------------|--------------------------------------|
| Sim. Study ( $R_0 \approx 2.50$ ) | Stoch.Coal.SIR  | 20m 41s                              |
|                                   | Deter.Coal.SIR  | 3m 27s                               |
|                                   | BDSIR           | 56m 27s                              |
| Sim. Study ( $R_0 \approx 1.50$ ) | Stoch.Coal.SIR  | 1h 43m 30s                           |
|                                   | Deter.Coal.SIR  | 3m 47s                               |
|                                   | BDSIR           | 41m 35s                              |
| Sim. Study ( $R_0 \approx 1.10$ ) | Stoch.Coal.SIR  | 1h 50m 41s                           |
|                                   | Deter.Coal.SIR  | 6m 45s                               |
|                                   | BDSIR           | 41m 21s                              |
| H1N1                              | Stoch.Coal.SIR  | 1h 20m 55s                           |
|                                   | Deter.Coal.SIR  | 9m 44s                               |
|                                   | BDSIR           | 47m 33s                              |
| HIV-1                             | Stoch.Coal.SIR  | 14h 37m 45s                          |
|                                   | Deter.Coal.SIR  | 7m 56s                               |
|                                   | BDSIR           | 1h 38m 54s                           |
