# Supplementary material for: Inferring Epidemiological Dynamics with Bayesian Coalescent Inference: The Merits of Deterministic and Stochastic Models
Source: Oxford University Press journal article supplement (doi:10.1534/genetics.114.172791), 2014-12-19
Supplement: tables6.pdf [file tables6.pdf]

Table S6: Deterministic Coalescent SIR Results for Simulated Sequences:  $R_0 = 1.0987$  and  $S_0 = 499$ ,  $R_0 = 1.0989$  and  $S_0 = 999$ ,  $R_0 = 1.09945$  and  $S_0 = 1999$

| $\eta$          | Truth          | Mean   | Median | Error | Bias  | Relative HPD width | 95% HPD accuracy |
|-----------------|----------------|--------|--------|-------|-------|--------------------|------------------|
| $\mathcal{R}_0$ | $\approx 1.10$ | 1.89   | 1.28   | 0.62  | 0.63  | 0.40               | 52.00%           |
| $\gamma$        | 0.30           | 0.57   | 0.44   | 0.59  | 0.52  | 2.14               | 95.00%           |
| $S_{(0)}$       | 499            | 1830   | 1222   | 1.50  | 1.31  | 11.49              | 96.00%           |
| $z_{(0)}$       | (varies)       | 109.55 | 76.21  | 0.61  | 0.54  | 0.35               | 37.00%           |
| $\mathcal{R}_0$ | $\approx 1.10$ | 1.55   | 1.35   | 0.25  | 0.25  | 0.45               | 16.00%           |
| $\gamma$        | 0.30           | 0.27   | 0.24   | 0.20  | -0.12 | 1.23               | 61.00%           |
| $S_{(0)}$       | 999            | 1293   | 804    | 0.27  | -0.10 | 3.58               | 64.00%           |
| $z_{(0)}$       | (varies)       | 117.39 | 99.75  | 0.25  | 0.18  | 0.23               | 23.00%           |
| $\mathcal{R}_0$ | $\approx 1.10$ | 1.37   | 1.22   | 0.16  | 0.16  | 0.28               | 40.00%           |
| $\gamma$        | 0.30           | 0.26   | 0.24   | 0.18  | -0.14 | 1.13               | 64.00%           |
| $S_{(0)}$       | 1999           | 2292   | 1531   | 0.23  | -0.18 | 3.45               | 66.00%           |
| $z_{(0)}$       | (varies)       | 150.39 | 138.69 | 0.23  | 0.20  | 0.32               | 18.00%           |
