# Supplementary material for: Inferring Epidemiological Dynamics with Bayesian Coalescent Inference: The Merits of Deterministic and Stochastic Models
Source: Oxford University Press journal article supplement (doi:10.1534/genetics.114.172791), 2014-12-19
Supplement: tables7.pdf [file tables7.pdf]

Table S7: Simulation Study Details

| Type of simulated data                                                 | Inference models used                 |
|------------------------------------------------------------------------|---------------------------------------|
| 1. Varying $R_0$ and $S_0$ (orig.)                                     |                                       |
| (a) $R_0 \approx 1.1$ , $S_0 = 499$ , $\gamma = 0.25$ , $\psi = 0.15$  | Deter.Coal.SIR, Stoch.Coal.SIR, BDSIR |
| (b) $R_0 \approx 1.2$ , $S_0 = 499$ , $\gamma = 0.30$ , $\psi = 0.15$  | Deter.Coal.SIR                        |
| (c) $R_0 \approx 1.5$ , $S_0 = 499$ , $\gamma = 0.30$ , $\psi = 0.15$  | Deter.Coal.SIR, Stoch.Coal.SIR, BDSIR |
| (d) $R_0 \approx 1.5$ , $S_0 = 999$ , $\gamma = 0.30$ , $\psi = 0.20$  | Deter.Coal.SIR, Stoch.Coal.SIR, BDSIR |
| (e) $R_0 \approx 2.5$ , $S_0 = 999$ , $\gamma = 0.30$ , $\psi = 0.05$  | Deter.Coal.SIR, Stoch.Coal.SIR, BDSIR |
| 2. Varying $S_0$ for fixed $R_0$                                       |                                       |
| (a) $R_0 \approx 1.1$ , $S_0 = 499$ , $\gamma = 0.25$ , $\psi = 0.15$  | Deter.Coal.SIR, Stoch.Coal.SIR, BDSIR |
| (f) $R_0 \approx 1.1$ , $S_0 = 999$ , $\gamma = 0.30$ , $\psi = 0.20$  | Deter.Coal.SIR                        |
| (g) $R_0 \approx 1.1$ , $S_0 = 1999$ , $\gamma = 0.30$ , $\psi = 0.09$ | Deter.Coal.SIR                        |
| 3. Contemporaneous sampling                                            |                                       |
| (d) $R_0 \approx 1.5$ , $S_0 = 999$ , $\gamma = 0.30$ , $\psi = 0.20$  | Deter.Coal.SIR, Stoch.Coal.SIR, BDSIR |
| (e) $R_0 \approx 2.5$ , $S_0 = 999$ , $\gamma = 0.30$ , $\psi = 0.05$  | Deter.Coal.SIR, Stoch.Coal.SIR, BDSIR |
| 4. Phylogenetic uncertainty                                            |                                       |
| (e) $R_0 \approx 2.5$ , $S_0 = 999$ , $\gamma = 0.30$ , $\psi = 0.05$  | Deter.Coal.SIR, Stoch.Coal.SIR, BDSIR |
| 5. Reparameterization (growth rate)                                    |                                       |
| (e) $R_0 \approx 2.5$ , $S_0 = 999$ , $\gamma = 0.30$ , $\psi = 0.05$  | Deter.Coal.SIR                        |
