# Supplementary material for: Inferring Epidemiological Dynamics with Bayesian Coalescent Inference: The Merits of Deterministic and Stochastic Models
Source: Oxford University Press journal article supplement (doi:10.1534/genetics.114.172791), 2014-12-19
Supplement: tables8.pdf [file tables8.pdf]

Table S8: Epidemic Parameter Estimations from HIV-1 Subtype B Sequence Data

| <u>Inference Model</u><br>HIV cluster | $R_0$                 | $\gamma$                 | $S_0$                | Root of<br>the tree (yr) | Origin $z_0$ of the<br>epidemic (yr) |
|---------------------------------------|-----------------------|--------------------------|----------------------|--------------------------|--------------------------------------|
| <b>Stoch. Coal. SIR</b>               |                       |                          |                      |                          |                                      |
| Cluster 1                             | 3.31<br>(2.40 - 4.26) | 0.27<br>(8.17E-2 - 0.48) | 1165<br>(448 - 1974) | 1971<br>(1946-1987)      | 1969<br>(1942-1986)                  |
| Cluster 2                             | 2.42<br>(1.86 - 3.07) | 0.32<br>(7.72E-2 - 0.57) | 976<br>(371 - 1701)  | 1975<br>(1953 - 1988)    | 1972<br>(1947 - 1988)                |
| Cluster 3                             | 2.10<br>(1.07 - 3.73) | 0.41<br>(2.59E-2 - 0.86) | 1442<br>(33 - 4568)  | 1979<br>(1959 - 1990)    | 1973<br>(1943 - 1989)                |
| Cluster 4                             | 3.48<br>(1.69 - 5.24) | 0.28<br>(0.08 - 0.61)    | 1757<br>(148 - 5260) | 1964<br>(1922 - 1990)    | 1961<br>(1918 - 1991)                |
| Cluster 6                             | 3.09<br>(1.94 - 4.53) | 0.19<br>(3.72E-2 - 0.41) | 727<br>(236 - 1312)  | 1972<br>(1950 - 1989)    | 1970<br>(1947 - 1988)                |
| <b>Deter. Coal. SIR</b>               |                       |                          |                      |                          |                                      |
| Cluster 1                             | 3.43<br>(2.52 - 4.40) | 0.26<br>(6.95E-2 - 0.50) | 1158<br>(397 - 2023) | 1969<br>(1941-1987)      | 1967<br>(1939-1986)                  |
| Cluster 2                             | 2.34<br>(1.92 - 2.81) | 0.38<br>(0.13 - 0.66)    | 1163<br>(530 - 1895) | 1979<br>(1967 - 1989)    | 1977<br>(1964 - 1987)                |
| Cluster 3                             | 1.87<br>(1.42 - 2.43) | 0.54<br>(0.14 - 0.97)    | 1298<br>(399 - 2267) | 1979<br>(1965 - 1989)    | 1975<br>(1960 - 1987)                |
| Cluster 4                             | 3.35<br>(2.02 - 4.86) | 0.34<br>(8.22E-2 - 0.65) | 1479<br>(397 - 2792) | 1972<br>(1948 - 1990)    | 1971<br>(1946 - 1989)                |
| Cluster 6                             | 3.14<br>(1.98 - 4.64) | 0.18<br>(2.99E-2 - 0.37) | 693<br>(213 - 1241)  | 1971<br>(1949 - 1989)    | 1969<br>(1943 - 1988)                |
| <b>BDSIR</b>                          |                       |                          |                      |                          |                                      |
| Cluster 1                             | 3.22<br>(2.18-4.27)   | 0.30<br>(0.15-0.47)      | 880<br>(142-3592)    | 1986<br>(1983-1988)      | 1983<br>(1978-1987)                  |
| Cluster 2                             | 2.45<br>(1.53-3.68)   | 0.17<br>(0.06-0.35)      | 1745<br>(190-8892)   | 1983<br>(1979-1986)      | 1978<br>(1968-1984)                  |
| Cluster 3                             | 1.90<br>(1.22-2.78)   | 0.20<br>(0.09-0.39)      | 1540<br>(153-8558)   | 1985<br>(1981-1988)      | 1978<br>(1962-1986)                  |
| Cluster 4                             | 2.62<br>(1.45-4.29)   | 0.15<br>(0.06-0.31)      | 1921<br>(128-11007)  | 1987<br>(1983-1990)      | 1981<br>(1970-1988)                  |
| Cluster 6                             | 3.17<br>(1.73-5.43)   | 0.15<br>(0.06-0.31)      | 2862<br>(183-16909)  | 1986<br>(1981-1989)      | 1983<br>(1975-1989)                  |
