# Supplementary material for: Inferring Epidemiological Dynamics with Bayesian Coalescent Inference: The Merits of Deterministic and Stochastic Models
Source: Oxford University Press journal article supplement (doi:10.1534/genetics.114.172791), 2014-12-19
Supplement: tables9.pdf [file tables9.pdf]

Table S9: Deterministic Coalescent SIR Results from Trees Simulated with Higher  $S_0$  (with Fixed  $R_0$ ) and Higher  $R_0$  (with Fixed  $S_0$ )

| $\eta$          | Truth    | Mean   | Median | Error | Bias     | Relative HPD width | 95% HPD accuracy |
|-----------------|----------|--------|--------|-------|----------|--------------------|------------------|
| $\mathcal{R}_0$ | 2.50     | 2.68   | 2.49   | 0.13  | 0.04     | 0.81               | 98.00%           |
| $\gamma$        | 0.30     | 0.32   | 0.29   | 0.16  | 3.14E-3  | 1.27               | 99.00%           |
| $S_{(0)}$       | 999      | 1807   | 1133   | 0.52  | 0.29     | 4.59               | 98.00%           |
| $z_{(0)}$       | (varies) | 41.17  | 39.99  | 0.03  | 0.01     | 0.07               | 76.00%           |
| $\mathcal{R}_0$ | 2.50     | 3.28   | 2.97   | 0.23  | 0.20     | 1.42               | 100.00%          |
| $\gamma$        | 0.35     | 0.30   | 0.28   | 0.24  | -0.20    | 1.28               | 99.00%           |
| $S_{(0)}$       | 4999     | 7733   | 4838   | 0.34  | 0.03     | 4.18               | 100.00%          |
| $z_{(0)}$       | (varies) | 37.45  | 36.15  | 0.03  | 1.48e-3  | 0.06               | 56.00%           |
| $\mathcal{R}_0$ | 2.50     | 3.76   | 3.05   | 0.26  | 0.23     | 1.50               | 100.00%          |
| $\gamma$        | 0.40     | 0.33   | 0.31   | 0.26  | -0.22    | 1.22               | 100.00%          |
| $S_{(0)}$       | 9999     | 12,609 | 7405   | 0.35  | -0.15    | 3.31               | 100.00%          |
| $z_{(0)}$       | (varies) | 34.99  | 34.28  | 0.04  | -1.94e-3 | 0.05               | 43.00%           |
| $\eta$          | Truth    | Mean   | Median | Error | Bias     | Relative HPD width | 95% HPD accuracy |
| $\mathcal{R}_0$ | 2.50     | 2.68   | 2.49   | 0.13  | 0.04     | 0.81               | 98.00%           |
| $\gamma$        | 0.30     | 0.32   | 0.29   | 0.16  | 3.14E-3  | 1.27               | 99.00%           |
| $S_{(0)}$       | 999      | 1807   | 1133   | 0.52  | 0.29     | 4.59               | 98.00%           |
| $z_{(0)}$       | (varies) | 41.17  | 39.99  | 0.03  | 0.01     | 0.07               | 76.00%           |
| $\mathcal{R}_0$ | 3.50     | 3.92   | 3.76   | 0.18  | 0.06     | 0.95               | 95.00%           |
| $\gamma$        | 0.30     | 0.31   | 0.29   | 0.21  | -0.01    | 1.16               | 99.00%           |
| $S_{(0)}$       | 999      | 1909   | 1060   | 0.64  | 0.36     | 4.26               | 100.00%          |
| $z_{(0)}$       | (varies) | 30.65  | 30.35  | 0.04  | -6.35E-3 | 0.05               | 45.00%           |
| $\mathcal{R}_0$ | 5.00     | 6.13   | 5.53   | 0.20  | 0.12     | 1.39               | 100.00%          |
| $\gamma$        | 0.30     | 0.28   | 0.27   | 0.29  | -0.09    | 1.18               | 100.00%          |
| $S_{(0)}$       | 999      | 2144   | 1220   | 0.68  | 0.49     | 4.94               | 99.00%           |
| $z_{(0)}$       | (varies) | 26.28  | 25.26  | 0.03  | -0.01    | 0.03               | 52.00%           |
| $\eta$          | Truth    | Mean   | Median | Error | Bias     | Relative HPD width | 95% HPD accuracy |
| $\mathcal{R}_0$ | 5.00     | 7.20   | 6.37   | 0.27  | 0.23     | 2.53               | 100.00%          |
| $\gamma$        | 0.30     | 0.26   | 0.22   | 0.26  | -0.19    | 1.41               | 100.00%          |
| $S_{(0)}$       | 9999     | 17,339 | 10,518 | 0.31  | 0.12     | 4.91               | 100.00%          |
| $z_{(0)}$       | (varies) | 28.20  | 26.93  | 0.03  | -0.01    | 1.05               | 36.00%           |
